# Supplementary material for: Pyrogallol-Phloroglucinol-6,6-Bieckol Alleviates Obesity and Systemic Inflammation in a Mouse Model by Reducing Expression of RAGE and RAGE Ligands
Source: MDPI journal article supplement (doi:10.3390/md17110612), 2019-10-28
Supplement: s1 [file s1]

**Table S1. List of antibodies for Immunoassay**

| Antibody name  | Company                  | Catalogue number | Dilution rate | Application          |
|----------------|--------------------------|------------------|---------------|----------------------|
| CD86           | Santa cruz Biotechnology | sc-19617         | 1:100         | Immunohistochemistry |
| CD163          | Santa cruz Biotechnology | sc-20066         | 1:100         | Immunohistochemistry |
| RAGE           | Santa cruz Biotechnology | sc-365154        | 1:100         | Immunohistochemistry |
|                |                          |                  | 1:200         | ELISA                |
| AGEs           | Abcam                    | ab 23722         | 1:1000        | ELISA                |
| HMGB1          | Abcam                    | ab 18256         | 1:1000        | ELISA                |
| S100 $\beta$   | Abcam                    | ab 52642         | 1:500         | ELISA                |
| $\beta$ -actin | Cell signaling           | 4967S            | 1:1000        | Immunoblotting       |

**Table S2. List of primer for quantitative polymerase chain reaction**

| Gene           |         | Primer                                 |
|----------------|---------|----------------------------------------|
| CD86           | Forward | 5'-AGCAACTAATGCTGAAAGCACA-3'           |
|                | Reverse | 5'-CTCAGACCTGCCAAAGTTCTCT-3'           |
| CD80           | Forward | 5'-AGCAACTAATGCTGAAAGCACA-3'           |
|                | Reverse | 5'-CTCAGACCTGCCAAAGTTCTCT-3'           |
| CD163          | Forward | 5'- AGTGCCTCCCAAAAATGACTT -3'          |
|                | Reverse | 5'- GACCAATAGAATGGCTCCACA-3'           |
| CD206          | Forward | 5'-AGCAACTAATGCTGAAAGCACA-3'           |
|                | Reverse | 5'-CTCAGACCTGCCAAAGTTCTCT-3'           |
| TNF- $\alpha$  | Forward | 5'-TTCTGTCTACTGAACTTCGGGGTGATCGGTCC-3' |
|                | Reverse | 5'-GTATGAGATAGCAAATCGGCTGACGGTGTGGG-3' |
| IL-1 $\beta$   | Forward | 5'-CCTTTTCGTGAATGAGCAGAC -3'           |
|                | Reverse | 5'-AGAATGTGCCATGGTTTCTTG-3'            |
| $\beta$ -actin | Forward | 5'-ACAAAGCTGTTCAGTGTCTCCA-3'           |
|                | Reverse | 5'-CTCCGTTTCCAGAATACACACA-3'           |

Figure S1. Inhibiting effects of PPB on the expression of RAGE in visceral fat

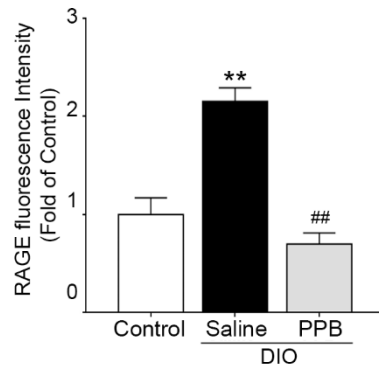

Fluorescence intensity of RAGE in visceral fat. Significance represented as \*\*,  $p < 0.01$  versus Control; ##,  $p < 0.01$  versus DIO/Saline. DIO, diet-induced obesity; PPB, pyrogallol-phloroglucinol-6,6-bieckol; RAGE, receptor for advanced glycation end-products.

Figure S2. Regulating effects of PPB on M1 and M2 type macrophage differentiation in visceral fat

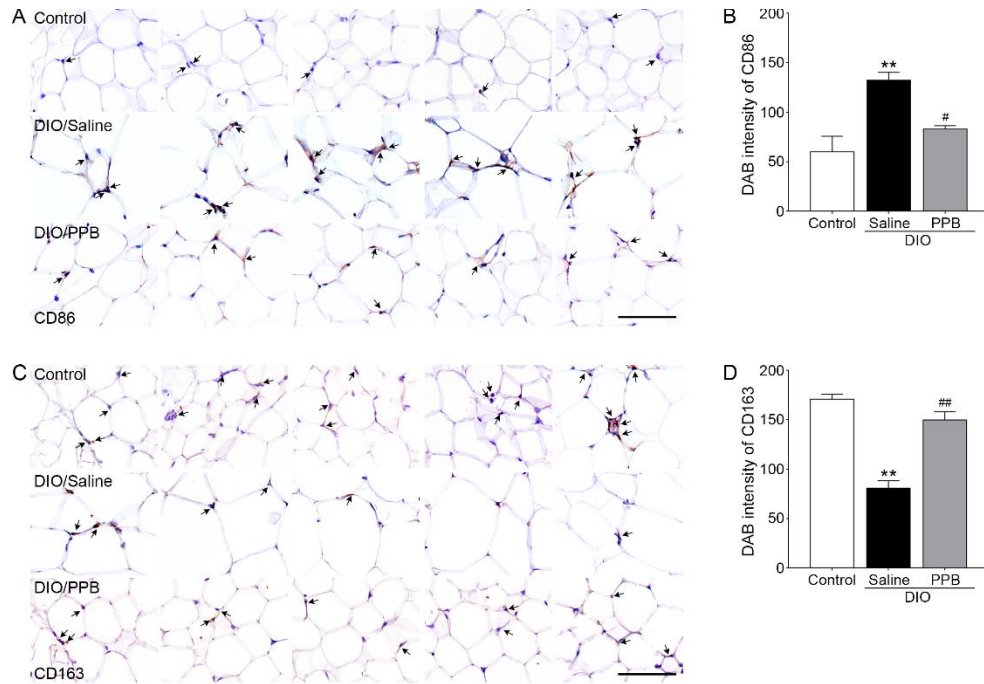

(A) Immunohistochemical images (CD86) and (B) quantified intensity graph are measured in visceral fat. (C) Immunohistochemical images (CD163) and (D) quantified intensity graph are measured in visceral fat. Scale bar = 200  $\mu$ m; x400 magnification. The significance represented as \*\*,  $p < 0.01$  versus Control; #,  $p < 0.05$  and ##,  $p < 0.01$  versus DIO/Saline. DAB, 3, 3-diaminobenzidine; DIO, diet-induced obesity; PPB, pyrogallol-phloroglucinol-6,6-bieckol

Figure S3. Visceral fat protein purification for control, DIO/Saline and PPB

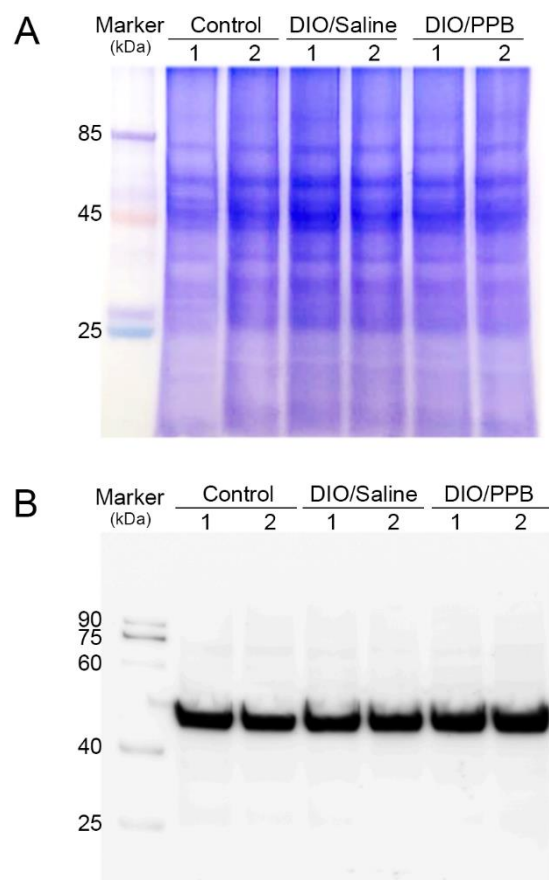

(A) Coomassie blue staining and (B) immunoblotting for  $\beta$ -actin were used for visceral fat protein purification. DIO, diet-induced obesity; PPB, pyrogallol-phloroglucinol-6,6-bieckol
